1 **Running head:** Performance of co-occurring plants

2

3 **Title:** Does a history of co-occurrence predict plant performance, community productivity, or  
4 invasion resistance?

5

6 **List of Authors:**

7 Alison C. Agneray<sup>1,2\*</sup>

8 Matthew L. Forister<sup>1</sup>

9 Thomas L. Parchman<sup>1</sup>

10 Elizabeth A. Leger<sup>1</sup>

11

12 <sup>1</sup> Graduate Program in Ecology, Evolution, and Conservation Biology, Department of Biology,  
13 University of Nevada, Reno, 1664 N. Virginia Street, Mail Stop 314, Reno, NV 89557

14 <sup>2</sup> Bureau of Land Management Nevada State Office, 1340 Financial Blvd., Reno, NV 89502

15 \* Correspondence: [aagneray@gmail.com](mailto:aagneray@gmail.com)

16

17 **Data Accessibility Statement**

18 The data files will be made available on the Dryad Digital Repository upon acceptance.

19 **Journal name:** Ecology

20 **Manuscript type:** Article

21 **Keywords:**

22 allopatry, community evolution, complementarity, co-selection, invasion resistance, niche

23 differentiation, plant productivity, species interactions, sympatry

24 **Abstract**

25           A history of species co-occurrence in plant communities is hypothesized to lead to  
26 greater niche differentiation, more efficient resource partitioning, and more productive, resistant  
27 communities as a result of evolution in response to biotic interactions. We asked if individual  
28 species or community responses differed when communities were founded with species sharing a  
29 history of co-occurrence (sympatric) or with species originating from different locations  
30 (allopatric). Using shrub, grass, and forb species from six locations in the western Great Basin,  
31 USA, we compared establishment, productivity, reproduction, phenology, and resistance to  
32 invaders for experimental communities with either sympatric or allopatric associations. Each  
33 community type was planted with six taxa in outdoor mesocosms, measured over three growing  
34 seasons, and invaded with the annual grass *Bromus tectorum* in the final season. For most  
35 populations, the allopatric or sympatric status of neighbors was not important. However, in some  
36 cases it was beneficial for some species from some locations to be planted with allopatric  
37 neighbors, while others benefited from sympatric neighbors, and some of these responses had  
38 large effects. For instance, the *Elymus* population that benefited the most from allopatry grew  
39 50% larger with allopatric neighbors than in single origin mesocosms. This response affected  
40 invasion resistance, as *B. tectorum* biomass was strongly affected by productivity and phenology  
41 of *Elymus* spp., as well as *Poa secunda*. Our results demonstrate that while community  
42 composition can in some cases affect plant performance in semi-arid plant communities,  
43 assembling sympatric communities is not sufficient to ensure high ecosystem services. Instead,  
44 we observed a potential interaction between sampling effects and evolutionary history that can  
45 create invasion resistant allopatric communities.

46

## 47 **Introduction**

48 Plant species that are adapted to similar environmental conditions can co-occur long-term  
49 if there are mechanisms facilitating coexistence (Chesson, 2000; Keddy, 1992; Levine et al.,  
50 2017). Niche differentiation is one process that allows coexisting species to partly escape  
51 competition for resources such as water, nutrients, and light (Godoy et al., 2020; Silvertown,  
52 2004). Character displacement as a result of niche differentiation is a complex outcome of eco-  
53 evolutionary processes which can vary across time, spatial scales, and ecosystems (Eisen &  
54 Geber, 2018; Pearman et al., 2008; Thorpe et al., 2011). Though not ubiquitous, niche  
55 differentiation has commonly evolved in temperate plant species, resulting in plant communities  
56 with a mixture of rooting depths, varying phenology, alternative life histories, and differing leaf  
57 morphology (Bakker et al., 2021; Hector et al., 2010; Kulmatiski et al., 2020; Silvertown, 2004).  
58 This niche differentiation can lead to complementarity and facilitation between interacting plant  
59 neighbors, resulting in productive plant communities with a variety of species that partition  
60 available resources across time and space (Camarretta et al., 2020; Grady et al., 2017; van  
61 Moorsel et al., 2018).

62 In addition to the many observations of niche differentiation among interacting species,  
63 geographic variation in species interactions also commonly leads to trait differentiation among  
64 populations of the same species (Fernandes et al., 2019; Thompson, 2005; Thorpe et al., 2011).  
65 Variation in local interactions can generate differences in functional traits among populations of  
66 the same species, and lead to differences in niche overlap among species with a history of  
67 sympatry (shared evolutionary history at a single growing site) versus allopatry (divergent  
68 histories sourced from different sites; Eisen & Geber, 2018; Kooyers et al., 2017; Thorpe et al.,  
69 2011; Zuppinge-Dingley et al., 2014). Most work describing the impacts of evolutionary history

70 on niche differentiation in plant populations has been performed on pairs of closely related  
71 species (Eisen & Geber, 2018; Kooyers et al., 2017), experimentally altered populations in  
72 grasslands (Chanway et al., 1988; van Moorsel et al., 2018; Zuppinger-Dingley et al., 2014),  
73 small numbers of species within the same functional groups (Camarretta et al., 2020; Grady et  
74 al., 2017), or through theoretical models (Aubree et al., 2020). There is evidence that a history of  
75 sympatry can positively affect individual plant performance, though in experiments varying the  
76 number of interacting species, the strongest evidence has been found with fewer interacting  
77 species from simulated or experimentally created communities (Aubree et al., 2020; van Moorsel  
78 et al., 2018). This raises the question of whether these dynamics can be observed in natural  
79 systems or with a greater number of species and functional groups.

80         Beyond effects at the species level, there has long been interest in emergent properties  
81 that result from plant interactions, especially the question of whether there are community-level  
82 outcomes that differ when co-occurring species have a history of coevolution (Aarssen 1983;  
83 Chanway et al., 1988; Whitman et al., 2020). For example, the traits within populations that are  
84 shaped from a history of interaction with sympatric species could lead to communities with  
85 greater primary productivity, resilience in the face of disturbance, and resistance to invasion due  
86 to increased complementarity and facilitation, if efficient resource use leads to overperformance  
87 in a coevolved community (Germain et al., 2016; van Moorsel et al., 2021; Zuppinger-Dingley et  
88 al., 2014). The best-studied of such responses is overyielding, wherein plant communities  
89 demonstrate enhanced primary productivity when they have a history of co-occurrence  
90 (Chanway et al., 1988; Grady et al., 2017; van Moorsel et al., 2018). In some experiments,  
91 mechanisms for greater productivity have been attributed to asynchronous phenology and less  
92 root overlap allowing plants to fully utilize available resources and increase aboveground

93 biomass (Zuppinge-Dingley et al., 2014). However, one critique of studies comparing  
94 communities with sympatric vs. allopatric histories is that community-level effects are often  
95 assumed from observations of trait differences in sympatric populations, rather than measured  
96 directly (Germain et al., 2018).

97       Even in the absence of coevolutionary dynamics, there may be reasons why sympatric  
98 communities behave differently than assemblages of species with allopatric origins. If  
99 communities are assembled as a result of coincidental dispersal histories or ecological sorting,  
100 they may share evolutionary responses to the same environment (Gleason, 1926; Hubbell, 2001;  
101 Keddy, 1992). Thus, contrary to predictions about niche partitioning in interacting species, a  
102 shared environment could lead to shared characteristics and reduced niche differentiation in  
103 sympatric populations. For example, in stressful arid environments, greater root allocation and  
104 earlier emergence are often favorable and evolve in multiple species from different functional  
105 groups (Agneray et al., 2022; Baughman et al., 2019). Because the relative importance of plant  
106 competition decreases when environmental stress is high (Grime, 1977; Martínez-Blancas &  
107 Martorell, 2020), one might expect less evidence for character displacement among interacting  
108 species from low resource environments (Eisen & Geber, 2018; Kooyers et al., 2017; Thompson,  
109 2005). Moreover, niche differentiation and complementarity are not required mechanisms for  
110 observing differences in community function: many studies have observed that emergent  
111 properties like productivity can be driven by sampling or dominance effects. For example, in  
112 experimentally assembled communities, certain populations or species with above average  
113 biomass can dominate the system and have outsized impacts on the resulting community biomass  
114 (Godoy et al., 2020; Mahaut et al., 2020).

115           Here, we evaluated the impact of occurrence history on interactions between multiple  
116 functional groups using wild-collected seeds of perennial grasses, forbs, and shrubs from the  
117 Great Basin US, a semi-arid system. This region encompasses a vast expanse of contiguous,  
118 undeveloped land, but disturbance and invasion, primarily from introduced annual grasses, make  
119 this area of high interest for conservation and restoration, including large-scale seeding to found  
120 communities of wild plants (Davies et al., 2011) We tested whether sympatric or allopatric  
121 histories affected species and community-level outcomes by growing the same set of six co-  
122 occurring species from six natural communities in experimental mesocosm communities for  
123 three growing seasons. Each community was assembled from either sympatric neighbors (six  
124 communities), or in six randomly assigned allopatric communities, creating 12 different  
125 communities that differed in interaction history but contained the same six species. We asked  
126 three questions: 1) do plants perform differently when grown with sympatric or allopatric  
127 neighbors, and do responses differ among species or populations? 2) do community-level  
128 responses (total productivity, total survival, total flower production, or invasive suppression)  
129 differ among allopatric or sympatric treatments? and 3) can we identify factors that can predict  
130 differences in invasion resistance among experimentally assembled communities? These  
131 questions are important for understanding how wild plant communities form and function, and in  
132 addition, are critical for guiding ecological restoration, which commonly assembles new  
133 communities using seeds from different locations (Kettenring et al., 2014).

134           On the one hand, based on theory and work from many temperate communities, one  
135 might expect that individual plants would perform better (grow larger, produce more flowers,  
136 and have higher survival) when grown with neighbors having a sympatric history of co-  
137 occurrence. As a result of this increased individual performance, sympatric mixes would be

138 expected to have above average performance at a community level relative to allopatric  
139 communities due to their potentially differentiated characteristics. In an applied context, a  
140 consistent, positive effect of planting sympatric populations could lead to improved restoration  
141 outcomes and increased ecosystem function. On the other hand, semi-arid systems are  
142 underrepresented in the experimental community literature, and an alternative set of expectations  
143 include a reduced importance for sympatric histories and competition (Callaway et al., 2002),  
144 and a greater role for environmental filtering in shaping plant characteristics in resource-poor  
145 environments. Finally, we hypothesized that the performance of perennial grass species would  
146 have an outsized effect on invasion resistance based on their functional group. We expected that  
147 perennial grasses would compete more directly with the invasive, annual grass, due to their  
148 similar phenology and previous work showing the potential for strong interactions, including  
149 natural selection in response to invasion (Leger & Goergen, 2017).

## 150 **Methods**

### 151 **Species selection and seed collection**

152 We focused our work within the sagebrush-dominated regions of the western Great  
153 Basin. This semi-arid region is characterized by cold winters and hot, dry summers with highly  
154 variable precipitation that falls primarily in the winter as both rain and snow (West, 1983), and  
155 water is a primary resource limiting plant growth (Donovan & Ehleringer, 1994). Plant  
156 communities in the Great Basin are mixtures of native shrubs, perennial grasses, and perennial  
157 and annual forbs, along with a robust component of introduced and invasive annual grasses and  
158 forbs (West, 1983). In particular, *Bromus tectorum* L., or cheatgrass, is an annual invasive grass  
159 that is now ubiquitous in the sagebrush steppe and is highly competitive with native plants  
160 (Melgoza et al., 1990). Most native and introduced grasses germinate after the first fall

161 rainstorms following a period of dormancy in the hottest summer months. Forbs are more  
162 variable, germinating in the fall, winter, or spring depending on temperatures and life history  
163 strategy (Barga et al., 2018), while shrubs typically germinate in the late winter and early spring  
164 after a period of cold stratification (Bonner & Karrfalt, 2008).

165 Target species were selected after conducting plant surveys in 21 locations in western  
166 Nevada, eastern California, and southeastern Oregon, with the goal of identifying the most  
167 commonly co-occurring plant community dominants. We selected six of the most common  
168 native plant species representing a variety of life forms. Species included three perennial grasses  
169 (*Elymus* spp. L., *Achnatherum thurberianum* (Piper) Barkworth, *Poa secunda* J. Presl), two  
170 shrubs (*Artemisia tridentata* Nutt. and *Ericameria nauseosa* (Pall. ex Pursh) G.L. Nesom &  
171 Baird), and one annual/biennial forb (*Chaenactis douglasii* (Hook.) Hook. & Arn.). We included  
172 sites where *Elymus elymoides* (Raf.) Swezey and *E. multisetus* M.E. Jones co-occur and likely  
173 hybridize, given their shared distribution in the western Great Basin (Barkworth et al., 2007). For  
174 simplicity, we refer to *Elymus* taxa jointly as a “species”, even though some *Elymus* collections  
175 may include two hybridizing species.

176 We identified six collection sites with similar climatic conditions where all focal species  
177 occurred (Figure S1). Sites were primarily mid-elevation, sagebrush steppe communities, with  
178 average annual precipitation between 236 and 383 mm and elevation ranging from 1395-2055 m  
179 (PRISM Climate Group, 2004). We bulk-collected mature seeds from a minimum of 50  
180 individual plants for each species from each location between 1 June and 15 December of 2015.

181



## 182 Experimental mesocosms

183 We prepared 90 mesocosms (Figure S2; 200L) outside of the Valley Road Greenhouse  
184 Complex at the University of Nevada, Reno (39.537924, -119.804757). Each mesocosm was  
185 filled with locally sourced topsoil to 0.9m depth (soil surface area = 0.25m<sup>2</sup>, soil volume  
186 =0.3m<sup>3</sup>). Seeds were examined on a light table to ensure seed fill, and planted in November  
187 2016, following the same orientation and planting design in each mesocosm (Figure S2). Each  
188 mesocosm included two replicates of *Elymus* spp. and *A. thurberianum*, six replicates of *P.*  
189 *secunda*, and one replicate of *C. douglasii*, *E. nauseosa*, and *A. tridentata* to approximate a dense  
190 natural plot, and two seeds were sown into each planting position to increase the chances of  
191 seedling emergence. In cases where seedlings from both seeds established, each planting position  
192 was thinned to one seedling based on a random coin flip. To augment direct seeding, plants of  
193 each species and site were also grown in the greenhouse to serve as replacements for plants  
194 failing to establish directly from seed.

195 We created two treatment types, sympatric or allopatric, with six different combinations  
196 for each treatment. In the sympatric treatments, seeds of all six species from one of the six  
197 locations were sown together. In the allopatric treatments, seeds from each species and location  
198 were randomly assigned to one of six allopatric mixes, with one representative species from each  
199 location in each allopatric mix. This led to a total of 12 unique communities, which were each  
200 planted with seven or eight replicates, for a total of 90 mesocosms.

201 Mesocosm soil was initially watered to maximum water holding capacity and lightly  
202 watered once weekly if no natural precipitation had occurred. Each mesocosm was monitored for  
203 seedling emergence from November 2016 to May 2017, and seedlings were thinned as needed.  
204 In May 2017, for any plants that failed to recruit from seed, individuals were transplanted from

205 seeds sown in the greenhouse. At the end of August 2017, when many of the perennial grasses  
206 had become senescent, every plant was assessed for height, crown size (length  $\times$  width),  
207 senescence index (a visual estimate using a continuous integer between 0-3; 0 = no live tissue  
208 and 3 = >75% green tissue), and the number of inflorescences. Starting in late September 2017,  
209 the second growing season, a new round of monitoring began following several rainstorms. We  
210 tracked new leaf growth and survival through May 2018. As in the previous year, in May 2018,  
211 we replaced any dead individuals. From May to October 2018, we noted whether plants had  
212 green tissue (0/1) on a weekly basis and used this information to estimate the number of days a  
213 given plant had potentially photosynthetically active tissue during the growing season. At the end  
214 of August 2018, each plant was assessed for crown size, height, senescence index, and the  
215 number of inflorescences.

216 In October 2018, each mesocosm was invaded with 130 *B. tectorum* seeds to test invasion  
217 resistance, with seeding density based on a field survey of seed production in a moderately  
218 invaded site. Seeds were lightly raked into the soil surface, in interspaces between plants. All  
219 plants were grown through August 2019 and watered as needed as in previous years. In August  
220 2019, the aboveground biomass of all plants was harvested, oven-dried, and weighed.

221 Annual productivity was estimated from measurements of native plant volume in years 1  
222 and 2 (calculated as crown size multiplied by plant height) and from aboveground biomass in  
223 2019, and reproductive output was estimated as the number of inflorescences per plant. Overall  
224 survival was measured from the number of transplants used to replace dead plants required at  
225 any planting location in a mesocosm over all three growing seasons. The total mass of *B.*  
226 *tectorum* per mesocosm was used as the indicator of invasion resistance. For species that have  
227 senescence as part of their life history strategy (all but *A. tridentata*), phenology was evaluated in

228 two different ways: 1) the total number of days that a given plant had green tissue from fall  
229 through spring (September through May), or 2) the senescence index measured in August.

### 230 **Statistical analysis**

231 We first used community composition models to analyze overall community composition  
232 and plant survival in each year, using linear models implemented in R version 4.1.0 (R Core  
233 Team, 2021). These models included species, community, and a species x community interaction  
234 as fixed effects with survival, plant volume, or biomass as response variables. Response  
235 variables were transformed as needed to better fit model assumptions (Table S1). *F* statistics and  
236 *p*-values were calculated using the R package ‘car’ (Fox & Weisberg, 2019). The goodness of fit  
237 ( $R^2$ -values) was calculated with the R package ‘MuMIn’ (Barton, 2020) for this and all glm  
238 models and post-hoc contrasts were generated using the Tukey honest significant differences  
239 method with the ‘agricolae’ R package (de Mendiburu & Yaseen, 2020). Residual histograms  
240 and scatterplots of predictors and response variables were created to verify model assumptions of  
241 normality (e.g., Figure S3), homogeneity of variances (e.g., Figure 2), and linearity of  
242 relationships (e.g., Figure 4).

243 **Q1: Do plants perform differently when grown with sympatric or allopatric neighbors, and do**  
244 **responses differ among species or populations?**

245 We created a main effects model asking whether individual plants had responses to  
246 sympatric or allopatric neighbors, using linear models with species, collection site, and treatment  
247 (allopatric or sympatric) as fixed effects. For grass species, we used linear mixed models that  
248 included mesocosm as a random (intercept) effect, as they had multiple replicates in a mesocosm  
249 (Bates et al., 2015). Response variables included survival, size, reproduction, and phenological  
250 variables. Based on our previous work, we expected considerable variation among species, thus

251 we also built species-specific models asking whether there were species- or location-specific  
252 differences in response to sympatric or allopatric neighbors. First, we first created linear mixed  
253 models for each species that included survival as response and collection site, treatment, and the  
254 interaction between site and treatment as fixed effects. Then, we asked whether surviving plants  
255 of each species differed in size, phenology, or reproduction in allopatric or sympatric  
256 communities using the same model structure described above, but also included plant age (days  
257 since transplanting) as a covariate; response variables were transformed as needed (see Table S1  
258 for transformations and Figure S3 for histograms of residual error).

259 Q2: Do community-level responses differ among allopatric or sympatric treatments?

260 We then quantified whether community-level responses (total productivity, total survival,  
261 inflorescence production, or *B. tectorum* suppression) differed among unique communities or by  
262 allopatric/sympatric treatment using linear models on the aggregated community level values per  
263 mesocosm. Total responses were calculated by summing response values across all individual  
264 plants in each mesocosm. Models included treatment (allopatric/sympatric) and unique  
265 community (one of the 12 allopatric or sympatric combinations, nested within treatment) as fixed  
266 effects, and separate models were created for each response variable and each year of  
267 measurement, with transformations as needed (Table S1, Figure S3). Means were again  
268 compared using the Tukey honest significant differences method for multiple comparisons.

269 Q3: Can we identify factors that can predict differences in invasion resistance?

270 After assessing whether communities differed in key performance metrics, we sought to  
271 identify factors that might explain the observed differences in *B. tectorum* invasion resistance.  
272 For this, we asked whether any individual species was having an outsized predictive effect on *B.*  
273 *tectorum* biomass. We took a tiered model building approach. First, we considered potential

274 explanatory variables (survival, inflorescence production, volume, senescence level of native  
275 plants prior to invasion, and the number of live green days experienced during the fall-winter of  
276 invasion) separately for each species. For grass species, we summed the values across the  
277 replicates within a community to represent the total performance of a species. We ran a set of  
278 generalized linear models separately for each metric of performance and each species,  
279 considering whether any individual response for an individual species predicted *B. tectorum*  
280 biomass, log transformed for analysis (Table S1, Figure S3). We then retained a subset of  
281 variables for a multiple regression model, which included the most impactful explanatory  
282 variables ( $p < 0.05$ ) from the previous analyses, further reducing as needed to ensure no variable  
283 in the model had a VIF greater than 3 (Fox & Weisberg, 2019). Finally, we retained significant  
284 variables to create a final multiple regression model of species-level responses that best  
285 explained *B. tectorum* biomass.

## 286 **Results**

287 Community composition changed dramatically over time, consistent with successional  
288 patterns in these plant communities (Figure 1). In the first growing season, the community  
289 composition model revealed differences in the size of each species ( $F_{5,468} = 73.3, p < 0.001$ ), with  
290 *C. douglasii* and/or *Elymus* spp. being the largest components of experimental communities.  
291 There was also a significant community x species effect ( $F_{55,468} = 1.5, p = 0.015$ ), primarily  
292 caused by several sources of *C. douglasii* growing significantly larger or smaller than collections  
293 from other locations (Figure 1a). In the second growing season, there were again differences  
294 among species ( $F_{5,468} = 76.8, p < 0.001$ ); *C. douglasii* almost completely died and *P. secunda*  
295 started to dominate alongside *Elymus* spp. Communities also began to differ significantly in  
296 overall volume (Figure 1b;  $F_{11,468} = 2.0, p = 0.030$ ), and species behaved differently across

297 community mixtures (community x species effect;  $F_{55,468} = 2.5, p < 0.001$ ), driven mostly by a  
298 few populations of *P. secunda* varying greatly among communities. In the final year, species  
299 again differed in size (Figure 1c;  $F_{5,468} = 163.6, p < 0.0001$ ), across community mixtures  
300 (community x species effect;  $F_{55,468} = 4.9, p < 0.001$ ), and in most communities, *Elymus* spp. and  
301 *A. tridentata* dominated the aboveground biomass.

302 In addition to differences in size, species also differed in overall survival in the  
303 community composition model, with *Elymus* spp. and *A. tridentata* experiencing the lowest  
304 mortality (Figure 1d;  $F_{5,468} = 118.9, p < 0.001$ ). Communities differed in overall survival ( $F_{11,468} =$   
305  $2.5, p = 0.005$ ), with plants growing in the single-origin, sympatric Peavine communities and  
306 random, allopatric community mixture 2 having significantly greater survival overall. Finally,  
307 there were also species x community interactions, driven primarily by *P. secunda* from Austin  
308 and Grey's Butte having a large number of deaths ( $F_{55,468} = 2.2, p < 0.001$ ), relative to *P. secunda*  
309 collected from other locations.

310 Q1: Do plants perform differently when grown with sympatric or allopatric neighbors, and do  
311 responses differ among species or populations?

312 In the main effects model, species strongly differed in every response variable, and  
313 collection sites varied in all but 4 of 10 responses, but no response variable had an overall main  
314 effect of allopatric or sympatric treatments (Table 1).

315 Results were similar when we considered each species on its own in the species-specific  
316 model: the identity of neighboring plants within the community (allopatric or sympatric) affected  
317 response variables only for certain species from certain collection sites (Figure 2, Table S2). For  
318 example, *Elymus* spp. from Alturas benefitted from allopatry in all three growing seasons,  
319 growing 50% larger on average in the allopatric mix in the first growing season than in the

320 single-origin, sympatric mesocosms (Figure 2b). *C. douglasii* was the only plant to experience an  
321 overall treatment effect: individuals growing in sympatric communities produced significantly  
322 more inflorescences than when grown in allopatric communities, though effects for any single  
323 collection site were generally small (Figure 2a, Table S2B).

324 Many response variables varied across collection locations, as either main location effects  
325 or interactions with treatment, with a few exceptions for productivity (i.e., year 2 volume in *A.*  
326 *thurberianum*, *A. tridentata*, and *C. douglasii*) and indicators of phenology (i.e., senescence  
327 index and live green days in the fall; Table S2). Only *P. secunda* varied significantly in survival  
328 based on collection location and *Elymus* spp. had a significant treatment by collection location  
329 effect, with plants sourced from Patagonia and Highway 140 experiencing greater mortality in  
330 sympatric mesocosms (Table S2A). Plant age was significantly predictive of most response  
331 variables, except for some of the phenology measurements for grass species (Table S2).

332 Q2: Do community-level responses differ among allopatric or sympatric treatments?

333 The main effect of sympatric or allopatric treatment had no significant predictive effect  
334 for nearly all response variables in the community response model (Table 2); the exception was  
335 the number of inflorescences in year one, which was driven by the weak but overall positive  
336 flowering response of *C. douglasii* to sympatric neighbors discussed above. Unique communities  
337 varied in total productivity in the final two growing seasons, as well as total survival and *B.*  
338 *tectorum* biomass (Figure 3, Table 2). For instance, allopatric mixture 2, which contained the  
339 *Elymus* spp. from Alturas that had a strong positive response to sympatric neighbors (Figure 1c,  
340 Figure 2b), grew the largest native plants in the final growing season and had some of the lowest  
341 overall mortality and smallest *B. tectorum*. However, other allopatric community combinations  
342 (e.g., allopatric mixtures 4 and 6) ranged from low to average in several performance metrics

343 (Figure 3). Similarly, sympatric communities were found in both the highest and lowest  
344 categories for each performance metric (Figure 3).

345 While both biomass and invasion suppression differed among communities (Figure 3,  
346 Table 2), the variation in native biomass production among communities was much lower than  
347 the variation in *B. tectorum* suppression. For example, in the 3<sup>rd</sup> year, there was a ~2-fold  
348 difference between the smallest and largest native biomass (60 g vs. 128 g), while there was an  
349 ~83-fold difference between the smallest and largest *B. tectorum* biomass (0.07 g vs 5.78 g), and  
350 a large range in the number of *B. tectorum* that survived in each mesocosm (3-51, average ~28  
351 plants).

352 In year two when all three grass species flowered, flower number varied by community,  
353 with allopatric mix 2 having the most flowers and allopatric mixture 4 having the least (Table 2,  
354 results not shown). Phenology and greenness timing were the responses least affected by either  
355 treatment or community, with only senescence index varying significantly among communities  
356 in the first year, driven by allopatric mixture 2 having significantly less senescence than  
357 allopatric mix 3 (results not shown).

358 Q3: Can we identify factors that can predict differences in invasion resistance?

359 We considered the relative importance of multiple factors that may contribute to *B. tectorum*  
360 suppression. Models including individual response variables for each species had variable  
361 predictive abilities (range of  $R^2 = 0 - 0.20$ ) and revealed that three species influenced *B. tectorum*  
362 invasion: *Elymus* spp., *P. secunda*, and, less so, *A. tridentata* (Table S3). Through our tiered  
363 model building approach, we found the most predictive model ( $R^2 = 0.44$ ) included the volume of  
364 *Elymus* spp. and *P. secunda*, the *Elymus* spp. senescence index (a measure of live green tissue  
365 present in August), and *P. secunda* green days over the fall-spring during invasion (Figure 4).



366 Greater *Elymus* spp. volume ( $F_{1,85} = 10.4, p = 0.002$ ) and *P. secunda* volume ( $F_{1,85} = 19.3, p$   
367  $< 0.001$ ) were associated with the smallest *B. tectorum* (Figure 4a, b), and *Elymus* spp. with  
368 higher senescence indices (more green tissue) in August were significantly correlated with lower  
369 *B. tectorum* biomass ( $F_{1,85} = 8.9, p = 0.004$ ; Figure 4c). Mesocosms containing *P. secunda* with  
370 fewer live green days over the fall had larger *B. tectorum* ( $F_{1,85} = 14.0, p < 0.001$ ; Figure 4d).

## 371 **Discussion**

372 Interactions among plants are fundamental components of all terrestrial ecosystems, and  
373 yet our understanding of how evolutionary and geographic history affect the nature of plant-plant  
374 interactions and community function is still incomplete. While positive effects of sympatric  
375 history have been observed with small numbers of interacting species (Aubree et al., 2020;  
376 Chanway et al., 1988; Grady et al., 2017; van Moorsel et al., 2018), our study provides the most  
377 species-rich test to-date of the effects of sympatry on community functions from wild,  
378 unmanipulated plant communities. Our results demonstrate that while community composition  
379 can sometimes affect plant performance and emergent community properties, planting sympatric  
380 communities is not sufficient to ensure high ecosystem services (Table 1). Where others have  
381 found clear benefits of growing plants with sympatric neighbors (Camarretta et al., 2020; Grady  
382 et al., 2017; van Moorsel et al., 2018), we instead found more nuanced results that varied across  
383 species, over time, and among response variables (Figure 2). Though responses were  
384 idiosyncratic, it is notable that one of the communities with the greatest resistance to invasion  
385 was formed when a population of the highly influential species (*Elymus* spp.) responded  
386 favorably to allopatric neighbors (*Elymus* spp. from Alturas; Figures 1 and 2). Thus, while our  
387 results do not support the idea that a history of sympatry produces complementarity in resource  
388 use that leads to improved individual plant fitness and reduced opportunity for species invasion,

389 our results do confirm that mixtures of species from different sources can result in altered  
390 community properties.

391         The lack of consistent response to sympatric or allopatric neighbors observed here  
392 supports the idea that the processes of niche differentiation or ecological sorting can be context  
393 dependent (Eisen & Geber, 2018). Sympatric communities did not display more complete use of  
394 resources, as evidenced by no overall aboveground biomass advantage, greater resistance to *B.*  
395 *tectorum*, greater survival, or greater reproduction for most species (Figure 3). We do note that  
396 the annual/biennial forb, *C. douglasii* did have a positive overall response to sympatric neighbors  
397 in an important fitness metric, inflorescence number, but it was the only consistent response. It is  
398 possible that productivity is not always enhanced through co-adaptation and instead of actively  
399 suppressing invasion, plants may adapt to tolerate invasive species, resulting in more stable,  
400 albeit less productive, communities (Aubree et al., 2020). We did not measure tolerance to  
401 invasion in this experiment, but it is possible that quantifying declines in native plant growth or  
402 reproduction in response to invasion could reveal differences in allopatric/sympatric  
403 communities that were not demonstrated by measuring productivity or invasive suppression  
404 alone. We also note our experimental communities consisted of mid- to long-lived species, and  
405 while our three-year experiment was longer than some, it is likely that additional dynamics  
406 would be revealed in a study of older plants. Indeed, differences in productivity among  
407 communities became more pronounced over the three-year study period (Figure 3).

408         Interactions among multiple species within each mesocosm can also create complex  
409 coexistence networks where higher-order interactions occur (Landi et al., 2018; Levine et al.,  
410 2017). In our experiment, it may be that the density and spatial arrangement of plants within  
411 mesocosms released some species from intraspecific competition, and instead emphasized

412 interspecific interactions. This may account for some of our findings if a particularly dominant  
413 species or population benefited through release from competition with intraspecific neighbors  
414 (Martínez-Blancas & Martorell, 2020). Additionally, it is possible that these plants are not  
415 interacting in the wild as much as one might assume, and that their sympatric co-occurrence is  
416 not associated with reciprocal selection pressures (Hubbell, 2001). Because we sampled wild  
417 communities, we do not know the length of interaction history, which is a factor that others have  
418 deliberately incorporated into manipulative experiments assessing the impacts of evolutionary  
419 history on community assembly (Weisser et al., 2017). Further, we note that while our  
420 experiment contained a relatively large number of species relative to pair-wise experiments, we  
421 only sampled a few community dominants, and acknowledge that natural plant communities  
422 would contain many more species of variable size, distribution, and age, all of which could affect  
423 community characteristics not captured here.

424         While the strength of interactions between the wild plants utilized in our experiment is  
425 unknown, there is clear evidence of interactions between native plants and invasive species in the  
426 Intermountain West (Colautti & Lau, 2015; Leger, 2008; Leger & Espeland, 2010) and clear  
427 evidence of interactions between native plants and invasives in our experiment (Table S3). For  
428 example, we found that the size and phenology of two grass species (*Elymus* spp. and *P.*  
429 *secunda*) more strongly predicted *B. tectorum* suppression than the community's overall native  
430 plant volume and senescence (Figure 4). The mesocosms with the lowest *B. tectorum* biomass  
431 were dominated by these two native grass species, and we note that mesocosms that had more  
432 even biomass distribution across the six species had low (allopatric mix 4) to average (Patagonia  
433 sympatric community) *B. tectorum* suppression, indicating that while they represented a more  
434 even native community, they were not as effective at resisting invasion. In restoration contexts,

435 this leads to the question of how to best create a community when we value opposing ecosystem  
436 properties, such as biodiverse habitats versus simpler communities with greater invasion  
437 resistance (e.g., Davies & Johnson 2017). It is possible that balancing these values will require  
438 careful consideration of not only species identities but species origins as well.

439         Few of our results aligned with expectations based on previous studies in grasslands (van  
440 Moorsel et al., 2018; Zuppinger-Dingley et al., 2014) and work within the same functional  
441 groups (Camarretta et al., 2020; Grady et al., 2017). It is possible that within our semi-arid study  
442 system, abiotic factors are more important drivers of the evolution of plant form, and the  
443 coevolutionary dynamics observed in more mesic systems are secondary influences within these  
444 plant communities. When considering the important community outcome of invasion  
445 suppression, we found evidence to support the ‘dominance’ effect theory since certain  
446 populations of *Elymus* spp. and *P. secunda* had strong effects on *B. tectorum* biomass (Figure 4;  
447 Mahaut et al., 2020). Further, while the sympatric/allopatric origin of plant neighbors had very  
448 few effects on individual plant performance, we were able to assemble one allopatric plant  
449 community where unknown factors aligned to increase the growth of one important native  
450 species and provided outsized suppression effects. Despite the fact that the low productivity of  
451 our system likely limited the importance of interactions and coevolutionary history, our results  
452 are consistent with a bigger picture of complex diversity effects that has emerged in recent years.  
453 In particular, a large analysis of grassland experiments from Europe found that many of the  
454 important effects of individual species were only realized under specific combinations of  
455 conditions (e.g., certain weather in particular years) (Isbell et al., 2011). In an applied context,  
456 our results suggest that there is unlikely to be any benefit from simply planting sympatric  
457 communities when assembling new communities via ecological restoration in this system.

458 Instead, it may be possible to create mixtures of the same species from different source  
459 populations that can result in different ecosystem functions.

## 460 **Acknowledgments**

461 This project was funded by grant 2017-67019-26336 from the USDA National Institute  
462 of Food and Agriculture Sustainable Agroecosystems program and Cooperative Agreement No.  
463 L16AC00318 from the Bureau of Land Management. Thank you to Drs. Kevin Shoemaker,  
464 Elizabeth Pringle, and Jenny Ouyang for discussions about design, analysis, and feedback to  
465 initial manuscript drafts. Additional thanks to Dr. Robert Nowak and Scot Ferguson for  
466 providing the mesocosms, and Shannon Swim, Owen Baughman, Meagan O'Farrell, Chase  
467 Estes, Georgia Peterson, Kalin Ingstad, Sage Ellis, Trevor Carter, Amber Durfee, Katelyn  
468 Josifko, Carley Crosby, and Casey Iwamoto for assistance with seed collection and processing,  
469 mesocosm filling and planting, and data collection.

## 470 **Literature Cited**

471 Aarssen, L. W. (1983). Ecological combining ability and competitive combining ability in plants:  
472 toward a general evolutionary theory of coexistence in systems of competition. *The*  
473 *American Naturalist*, 122(6), 707-731. <https://doi.org/10.1086/284167>  
474 Agneray, A. C., Parchman, T. L., & Leger, E. A. (2022). Phenotypic traits and environment  
475 strongly predict seedling survival for seven co-occurring Great Basin plant taxa growing  
476 with invasive grass. *Ecology & Evolution*, 12 (5), e8870.  
477 <https://doi.org/10.1002/ece3.8870>

- 478 Aubree, F., David, P., Jarne, P., Loreau, M., Mouquet, N., & Calcagno, V. (2020). How  
479 community adaptation affects biodiversity–ecosystem functioning relationships. *Ecology*  
480 *Letters*, 23(8), 1263-1275. <https://doi.org/10.1111/ele.13530>
- 481 Bakker, L. M., Barry, K. E., Mommer, L., & van Ruijven, J. (2021). Focusing on individual  
482 plants to understand community scale biodiversity effects: the case of root distribution in  
483 grasslands. *Oikos*, 130(11), 1954-1966. <https://doi.org/10.1111/oik.08113>
- 484 Barga, S. C., Dilts, T. E., & Leger, E. A. (2018). Contrasting climate niches among  
485 co-occurring subdominant forbs of the sagebrush steppe. *Diversity and*  
486 *Distributions*, 24(9), 1291-1307. <https://doi.org/10.1111/ddi.12764>
- 487 Barkworth, M. E., Anderton, L. K., Capels, K. M., Long, S., & Piep, M. B. (2007). *Manual of*  
488 *grasses for North America*. University Press of Colorado.
- 489 Barton, K. (2020). *MuMIn: Multi-Model Inference*. R package version 1.43.17. [https://CRAN.R-](https://CRAN.R-project.org/package=MuMIn)  
490 [project.org/package=MuMIn](https://CRAN.R-project.org/package=MuMIn)
- 491 Bates, D. M., Mäechler, M., Bolker, B. M., & Walker, S. (2015). Fitting linear mixed-effects  
492 models using lme4. *Journal of Statistical Software*, 67(1), 1-48.
- 493 Baughman, O.W., Agneray, A.C., Forister, M.L., Kilkenny, F.F., Espeland, E.K., Fiegenger, R.,  
494 Horning, M.E., Johnson, R.C., Kaye, T.N., Ott, J., St. Clair, J.B., & Leger, E.A. (2019).  
495 Strong patterns of intraspecific variation and local adaptation in Great Basin plants  
496 revealed through a review of 75 years of experiments. *Ecology and Evolution*, 9(11),  
497 6259–6275. <https://doi.org/10.1002/ece3.5200>
- 498 Bonner, F. T., Karrfalt, R. P., eds. (2008). *The Woody Plant Seed Manual*. Agricultural  
499 Handbook No. 727. Washington, DC. *U.S. Department of Agriculture, Forest Service*. 1-  
500 1223.

- 501 Callaway, R.M., Brooker, R.W., Choler, P., Kikvidze, Z., Lortie, C.J., Michalet, R., Paolini, L.,  
502 Pugnaire, F.I., Newingham, B., Aschehoug, E.T. and Armas, C. (2002). Positive  
503 interactions among alpine plants increase with stress. *Nature*, 417(6891), 844-848.  
504 <https://doi.org/10.1038/nature00812>
- 505 Camarretta, N., Harrison, P. A., Bailey, T., Davidson, N., Lucieer, A., Hunt, M., & Potts, B. M.  
506 (2020). Stability of species and provenance performance when translocated into different  
507 community assemblages. *Restoration Ecology*, 28(2), 447-458.  
508 <https://doi.org/10.1111/rec.13098>
- 509 Chanway, C. P., Holl, F. B., & Turkington, R. (1988). Genotypic coadaptation in plant growth  
510 promotion of forage species by *Bacillus polymyxa*. *Plant and Soil*, 106(2), 281-284.  
511 <https://doi.org/10.1007/BF02371225>
- 512 Chesson, P. (2000). Mechanisms of maintenance of species diversity. *Annual Review of Ecology*  
513 *and Systematics*, 31(1), 343-366. <https://doi.org/10.1146/annurev.ecolsys.31.1.343>
- 514 Colautti, R. I., & Lau, J. A. (2015). Contemporary evolution during invasion: evidence for  
515 differentiation, natural selection, and local adaptation. *Molecular Ecology*, 24(9), 1999-  
516 2017. <https://doi.org/10.1111/mec.13162>
- 517 de Mendiburu, F. & Yaseen, M. (2020). *Agricolae: Statistical Procedures for Agricultural*  
518 *Research*. R package version 1.4.0, <https://myaseen208.github.io/agricolae/>[https://cran.r-](https://cran.r-project.org/package=agricolae)  
519 [project.org/package=agricolae](https://cran.r-project.org/package=agricolae)
- 520 Davies, K. W., Boyd, C. S., Beck, J. L., Bates, J. D., Svejcar, T. J., & Gregg, M. A.  
521 (2011). Saving the sagebrush sea: an ecosystem conservation plan for big sagebrush plant  
522 communities. *Biological Conservation*, 144(11), 2573-2584.

- 523 Davies, K. W., & Johnson, D. D. (2017). Established perennial vegetation provides high  
524 resistance to reinvasion by exotic annual grasses. *Rangeland Ecology & Management*,  
525 70(6), 748-754.
- 526 Donovan, L. A., & Ehleringer, J. R. (1994). Water stress and use of summer precipitation in a  
527 Great Basin shrub community. *Functional Ecology*, 289-297. <https://doi.org/2389821>
- 528 Eisen, K. E., & Geber, M. A. (2018). Ecological sorting and character displacement contribute to  
529 the structure of communities of *Clarkia* species. *Journal of Evolutionary Biology*, 31(10),  
530 1440-1458. <https://doi.org/10.1111/jeb.13365>
- 531 Fernandes, L. D., Lemos-Costa, P., Guimarães Jr, P. R., Thompson, J. N., & de Aguiar, M. A.  
532 (2019). Coevolution creates complex mosaics across large landscapes. *The American*  
533 *Naturalist*, 194(2), 217-229. <https://doi.org/10.1086/704157>
- 534 Fox, J. & Weisberg, S. (2019). *An {R} Companion to Applied Regression, Third Edition*.  
535 Thousand Oaks CA: Sage. URL:  
536 <https://socialsciences.mcmaster.ca/jfox/Books/Companion/>
- 537 Germain, R. M., Weir, J. T., & Gilbert, B. (2016). Species coexistence: macroevolutionary  
538 relationships and the contingency of historical interactions. *Proceedings of the Royal*  
539 *Society B: Biological Sciences*, 283(1827), 20160047.  
540 <https://doi.org/10.1098/rspb.2016.0047>
- 541 Germain, R. M., Williams, J. L., Schluter, D., & Angert, A. L. (2018). Moving character  
542 displacement beyond characters using contemporary coexistence theory. *Trends in*  
543 *Ecology & Evolution*, 33(2), 74-84. <https://doi.org/10.1016/j.tree.2017.11.002>
- 544 Gleason, H. A. (1926). The individualistic concept of the plant association. *Bulletin of the Torrey*  
545 *Botanical Club*, 7-26. <https://doi.org/2479933>



- 546 Godoy, O., Gómez-Aparicio, L., Matías, L., Pérez-Ramos, I. M., & Allan, E. (2020). An excess  
547 of niche differences maximizes ecosystem functioning. *Nature Communications*, *11*(1),  
548 1-10. <https://doi.org/10.1038/s41467-020-17960-5>
- 549 Grady, K. C., Wood, T. E., Kolb, T. E., Hersch Green, E., Shuster, S. M., Gehring, C. A., Hart,  
550 S. C., Allan, G. J., & Whitham, T. G. (2017). Local biotic adaptation of trees and shrubs  
551 to plant neighbors. *Oikos*, *126*(4), 583-593. <https://doi.org/10.1111/oik.03240>
- 552 Grime, J. P. (1977). Evidence for the existence of three primary strategies in plants and its  
553 relevance to ecological and evolutionary theory. *The American Naturalist*, *111*(982),  
554 1169-1194. <https://doi.org/10.1086/283244>
- 555 Hector, A., Hautier, Y., Saner, P., Wacker, L., Bagchi, R., Joshi, J., Scherer-Lorenzen, M.,  
556 Spehn, E. M., Bazeley-White, E., Weilenmann, M., Caldeira, M.C., Dimitrakopoulos, ...  
557 & Loreau, M. (2010). General stabilizing effects of plant diversity on grassland  
558 productivity through population asynchrony andoveryielding. *Ecology*, *91*(8), 2213-  
559 2220. <https://doi.org/10.1890/09-1162.1>
- 560 Hubbell, S. P. (2001). *A Unified Neutral Theory of Biodiversity and Biogeography*. Princeton  
561 University Press, Princeton, NJ.
- 562 Isbell, F., Calcagno, V., Hector, A., Connolly, J., Harpole, W.S., Reich, P.B., Scherer-Lorenzen,  
563 M., Schmid, B., Tilman, D., Van Ruijven, J. and Weigelt, A. (2011). High plant diversity  
564 is needed to maintain ecosystem services. *Nature*, *477*(7363), 199-202.
- 565 Keddy, P. A. (1992). Assembly and response rules: two goals for predictive community  
566 ecology. *Journal of Vegetation Science*, *3*(2), 157-164. <https://doi.org/10.2307/3235676>
- 567 Kettenring, K. M., Mercer, K. L., Reinhardt Adams, C., & Hines, J. (2014). EDITOR'S  
568 CHOICE: Application of genetic diversity–ecosystem function research to ecological

569 restoration. *Journal of Applied Ecology*, 51(2), 339-348. <https://doi.org/10.1111/1365->  
570 2664.12202

571 Kooyers, N. J., James, B., & Blackman, B. K. (2017). Competition drives trait evolution and  
572 character displacement between *Mimulus* species along an environmental  
573 gradient. *Evolution*, 71(5), 1205-1221. <https://doi.org/10.1111/evo.13200>

574 Kulmatiski, A., Adler, P. B., & Foley, K. M. (2020). Hydrologic niches explain species  
575 coexistence and abundance in a shrub–steppe system. *Journal of Ecology*, 108(3), 998-  
576 1008. <https://doi.org/10.1111/1365-2745.13324>

577 Landi, P., Minoarivelo, H. O., Brännström, Å., Hui, C., & Dieckmann, U. (2018). Complexity  
578 and stability of adaptive ecological networks: a survey of the theory in community  
579 ecology. In *Systems Analysis Approach for Complex Global Challenges* (pp. 209-248).  
580 Springer, Cham.

581 Leger, E. A. (2008). The adaptive value of remnant native plants in invaded communities: an  
582 example from the Great Basin. *Ecological Applications*, 18(5), 1226-1235.  
583 <https://doi.org/10.1890/07-1598.1>

584 Leger, E. A., & Espeland, E. K. (2010). Perspective: coevolution between native and invasive  
585 plant competitors: implications for invasive species management. *Evolutionary*  
586 *Applications*, 3(2), 169-178. <https://doi.org/10.1111/j.1752-4571.2009.00105.x>

587 Leger, E. A., & Goergen, E. M. (2017). Invasive *Bromus tectorum* alters natural selection in arid  
588 systems. *Journal of Ecology*, 105(6), 1509-1520. <https://doi.org/10.1111/1365->  
589 2745.12852

- 590 Levine, J. M., Bascompte, J., Adler, P. B., & Allesina, S. (2017). Beyond pairwise mechanisms  
591 of species coexistence in complex communities. *Nature*, *546*(7656), 56-64.  
592 <https://doi.org/10.1038/nature22898>
- 593 Mahaut, L., Fort, F., Violle, C., & Freschet, G. T. (2020). Multiple facets of diversity effects on  
594 plant productivity: Species richness, functional diversity, species identity and  
595 intraspecific competition. *Functional Ecology*, *34*(1), 287-298.  
596 <https://doi.org/10.1111/1365-2435.13473>
- 597 Martínez-Blancas, A., & Martorell, C. (2020). Changes in niche differentiation and  
598 environmental filtering over a hydric stress gradient. *Journal of Plant Ecology*, *13*(2),  
599 185-194. <https://doi.org/10.1093/jpe/rtz061>
- 600 Melgoza, G., Nowak, R. S., & Tausch, R. J. (1990). Soil water exploitation after fire:  
601 competition between *Bromus tectorum* (cheatgrass) and two native species. *Oecologia*,  
602 *83*(1), 7-13.
- 603 Pearman, P. B., Guisan, A., Broennimann, O., & Randin, C. F. (2008). Niche dynamics in space  
604 and time. *Trends in Ecology & Evolution*, *23*(3), 149-158.  
605 <https://doi.org/10.1016/j.tree.2007.11.005>
- 606 PRISM Climate Group. (2004). PRISM Data Explorer. *Oregon State University*:  
607 <http://prism.oregonstate.edu>
- 608 R Core Team. (2021). *R: a language and environment for statistical computing*. R Foundation  
609 for Statistical Computing, Vienna, Austria. Available at: <https://www.R-project.org/>. Last  
610 accessed 27 Nov. 2021.
- 611 Silvertown, J. (2004). Plant coexistence and the niche. *Trends in Ecology & Evolution*, *19*(11),  
612 605-611. <https://doi.org/10.1016/j.tree.2004.09.003>

- 613 Thompson, J. N. (2005). *The Geographic Mosaic of Coevolution*. University of Chicago Press.
- 614 Thorpe, A. S., Aschehoug, E. T., Atwater, D. Z., & Callaway, R. M. (2011). Interactions among  
615 plants and evolution. *Journal of Ecology*, *99*(3), 729-740. [https://doi.org/10.1111/j.1365-](https://doi.org/10.1111/j.1365-2745.2011.01802.x)  
616 [2745.2011.01802.x](https://doi.org/10.1111/j.1365-2745.2011.01802.x)
- 617 van Moorsel, S. J., Hahl, T., Wagg, C., De Deyn, G. B., Flynn, D. F., Zuppinger-Dingley, D., &  
618 Schmid, B. (2018). Community evolution increases plant productivity at low  
619 diversity. *Ecology Letters*, *21*(1), 128-137. <https://doi.org/10.1111/ele.12879>
- 620 van Moorsel, S. J., Hahl, T., Petchey, O. L., Ebeling, A., Eisenhauer, N., Schmid, B., & Wagg,  
621 C. (2021). Co-occurrence history increases ecosystem stability and resilience in  
622 experimental plant communities. *Ecology*, *102*(1), e03205.  
623 <https://doi.org/10.1002/ecy.3205>
- 624 Weisser, W. W., Roscher, C., Meyer, S. T., Ebeling, A., Luo, G., Allan, E., Beßler, H., Barnard,  
625 R. L., Buchmann, N., ... & Eisenhauer, N. (2017). Biodiversity effects on ecosystem  
626 functioning in a 15-year grassland experiment: Patterns, mechanisms, and open  
627 questions. *Basic and applied ecology*, *23*, 1-73.
- 628 West, N. E. (1983). Great Basin-Colorado Plateau sagebrush semi-desert. *Temperate Deserts and*  
629 *Semi-deserts*, *5*, 331-369.
- 630 Whitham, T. G., Allan, G. J., Cooper, H. F., & Shuster, S. M. (2020). Intraspecific genetic  
631 variation and species interactions contribute to community evolution. *Annual Review of*  
632 *Ecology, Evolution, and Systematics*, *51*, 587-612. [https://doi.org/10.1146/annurev-](https://doi.org/10.1146/annurev-ecolsys-011720-123655)  
633 [ecolsys-011720-123655](https://doi.org/10.1146/annurev-ecolsys-011720-123655)

634 Zuppinger-Dingley, D., Schmid, B., Petermann, J. S., Yadav, V., De Deyn, G. B., & Flynn, D. F.  
635 (2014). Selection for niche differentiation in plant communities increases biodiversity  
636 effects. *Nature*, 515(7525), 108-111. <https://doi.org/10.1038/nature13869>  
637

638 **Tables**

639 Table 1. Results of main effects models showing differences among species, collection sites, and  
 640 allopatric or sympatric treatments, considering survival for each planting location across the  
 641 three-year experimental period, and the size (length x width x height volume measurements in  
 642 years 1 and 2, and aboveground biomass in year 3), reproduction (inflorescence number), and  
 643 two measures of growing season phenology of surviving plants separately for each year. Values  
 644 reported are from linear models, and include numerator (n) and denominator (d) degrees of  
 645 freedom (df), test statistics ( $F$ ), and significance ( $p$ ) with bolded values indicating significance  
 646 <0.05.

|                         |                 | df <sub>n</sub> | df <sub>d</sub> | $F$    | $p$              |
|-------------------------|-----------------|-----------------|-----------------|--------|------------------|
| Survival                | Species         | 5               | 1151            | 40.7   | <b>&lt;0.001</b> |
|                         | Collection Site | 5               | 1151            | 3.8    | <b>0.002</b>     |
|                         | Treatment       | 1               | 1151            | 0.6    | 0.423            |
| Volume Y1               | Species         | 5               | 1111            | 520.7  | <b>&lt;0.001</b> |
|                         | Collection Site | 5               | 1111            | 11.8   | <b>&lt;0.001</b> |
|                         | Treatment       | 1               | 1111            | 0.6    | 0.455            |
| Volume Y2               | Species         | 5               | 988             | 44.2   | <b>&lt;0.001</b> |
|                         | Collection Site | 5               | 988             | 5.3    | <b>&lt;0.001</b> |
|                         | Treatment       | 1               | 988             | 0.9    | 0.349            |
| Aboveground biomass Y3  | Species         | 5               | 1037            | 112.1  | <b>&lt;0.001</b> |
|                         | Collection Site | 5               | 1037            | 4.3    | <b>&lt;0.001</b> |
|                         | Treatment       | 1               | 1037            | 0.3    | 0.611            |
| Inflorescence number Y1 | Species         | 1               | 175             | 460.6  | <b>&lt;0.001</b> |
|                         | Collection Site | 5               | 175             | 8.5    | <b>&lt;0.001</b> |
|                         | Treatment       | 1               | 175             | 1.2    | 0.270            |
| Inflorescence number Y2 | Species         | 4               | 473             | 55.0   | <b>&lt;0.001</b> |
|                         | Collection Site | 5               | 473             | 1.8    | 0.111            |
|                         | Treatment       | 1               | 473             | 0.5    | 0.491            |
| Senescence index Y1     | Species         | 5               | 1111            | 1139.0 | <b>&lt;0.001</b> |
|                         | Collection Site | 5               | 1111            | 3.2    | <b>0.007</b>     |
|                         | Treatment       | 1               | 1111            | 1.8    | 0.183            |
| Senescence index Y2     | Species         | 5               | 988             | 396.2  | <b>&lt;0.001</b> |
|                         | Collection Site | 5               | 988             | 1.3    | 0.276            |
|                         | Treatment       | 1               | 988             | 0.0    | 0.927            |
| Live green days Y1      | Species         | 5               | 1111            | 228.6  | <b>&lt;0.001</b> |

|                    |                 |   |      |      |                  |
|--------------------|-----------------|---|------|------|------------------|
|                    | Collection Site | 5 | 1111 | 1.5  | 0.192            |
|                    | Treatment       | 1 | 1111 | 0.0  | 0.839            |
| Live green days Y2 | Species         | 5 | 988  | 82.0 | <b>&lt;0.001</b> |
|                    | Collection Site | 5 | 988  | 0.8  | 0.549            |
|                    | Treatment       | 1 | 988  | 2.0  | 0.161            |

647

648

649 Table 2. Community response models showing differences in community-level survival, native  
 650 plant size (volume or aboveground biomass), invader size (*B. tectorum* aboveground biomass)  
 651 among twelve unique communities and two treatments (allopatric or sympatric). Values reported  
 652 are from linear models, and include numerator degrees of freedom (df), test statistics (*F*), and  
 653 significance (*p*) with bolded values indicating significance <0.05. The denominator degrees of  
 654 freedom are 78 across all models.

|                            |           | df <sub>n</sub> | <i>F</i> | <i>p</i>         |
|----------------------------|-----------|-----------------|----------|------------------|
| Survival                   | Community | 10              | 3.0      | <b>0.003</b>     |
|                            | Treatment | 1               | 0.5      | 0.502            |
| Volume Y1                  | Community | 10              | 1.2      | 0.287            |
|                            | Treatment | 1               | 0.7      | 0.405            |
| Volume Y2                  | Community | 10              | 2.2      | <b>0.026</b>     |
|                            | Treatment | 1               | 0.9      | 0.345            |
| Native biomass Y3          | Community | 10              | 3.6      | <b>&lt;0.001</b> |
|                            | Treatment | 1               | 1.1      | 0.289            |
| <i>B. tectorum</i> biomass | Community | 10              | 2.2      | <b>0.024</b>     |
|                            | Treatment | 1               | 1.2      | 0.286            |
| Inflorescence no. Y1       | Community | 10              | 2.8      | <b>0.006</b>     |
|                            | Treatment | 1               | 4.1      | <b>0.047</b>     |
| Inflorescence no. Y2       | Community | 10              | 4.2      | <b>&lt;0.001</b> |
|                            | Treatment | 1               | 0.1      | 0.712            |

655

656



657 Figure 1. Community composition in experimental mesocosms for three growing seasons (a-c)  
658 and (d) the distribution of native plant deaths across species and communities. Volume (length x  
659 width x height) and biomass values are the averages across 7-8 mesocosms of each community  
660 type, shown without variation for visual clarity. The number of deaths shown is proportional to  
661 the number planted for each species, calculated as the total number of deaths divided by the  
662 number planted per species per mesocosm. The composition of allopatric mixes is shown in  
663 Figure 3d and abbreviations indicate the seed source (Figure S1): AL(Alturas), AU (Austin), GB  
664 (Grey's Butte), HW (Highway 140), PA (Patagonia), PE (Peavine), A (allopatric mixtures 1-6).

665  
666 Figure 2. Differences in responses between sympatric and allopatric treatments for all species (a-  
667 f) and collection sites (x axis) with volume, biomass, survival across three growing seasons, and  
668 flower number or phenology. Some populations of some species had different responses to  
669 sympatric vs. allopatric neighbors, while many did not. Values are means  $\pm$  SE from the species-  
670 specific models that account for the effects of plant age and mesocosm (for grasses), which were  
671 transformed as needed for analysis and are shown here without transformation (Table S1, Figure  
672 S3).

673

674 Figure 3. Differences among 12 unique communities in size, survival, and invasion resistance.  
675 Native plant size is represented by total plant volume (length x width x height) in the (a) first and  
676 (b) second growing season, and by (c) total aboveground biomass in the third season. The unique  
677 community design (d) is displayed along with (e) total mortality of all native plants in each  
678 mesocosm and (f) *B. tectorum* aboveground biomass from invaded mesocosms. Box plots  
679 indicate medians, first to the third quartiles, and outliers shown as black points, calculated from  
680 7-8 replicate mesocosms per unique community; values were transformed as needed for analysis  
681 (Table S1, Figure S3).

682  
683 Figure 4. Marginal effects with pointwise 95% confidence intervals of the effects of (a) *Elymus*  
684 spp. volume, (b) *P. secunda* volume, (c) *Elymus* spp. senescence index (measurement of  
685 greenness in August), and (d) *P. secunda* phenology (the number of live green days in the fall  
686 preceding invasion) on *B. tectorum* aboveground biomass, which were the four best predictors  
687 used in the best multiple regression model ( $R^2=0.44$ ); model residuals are plotted in Figure S3.  
688

689 Figure 1

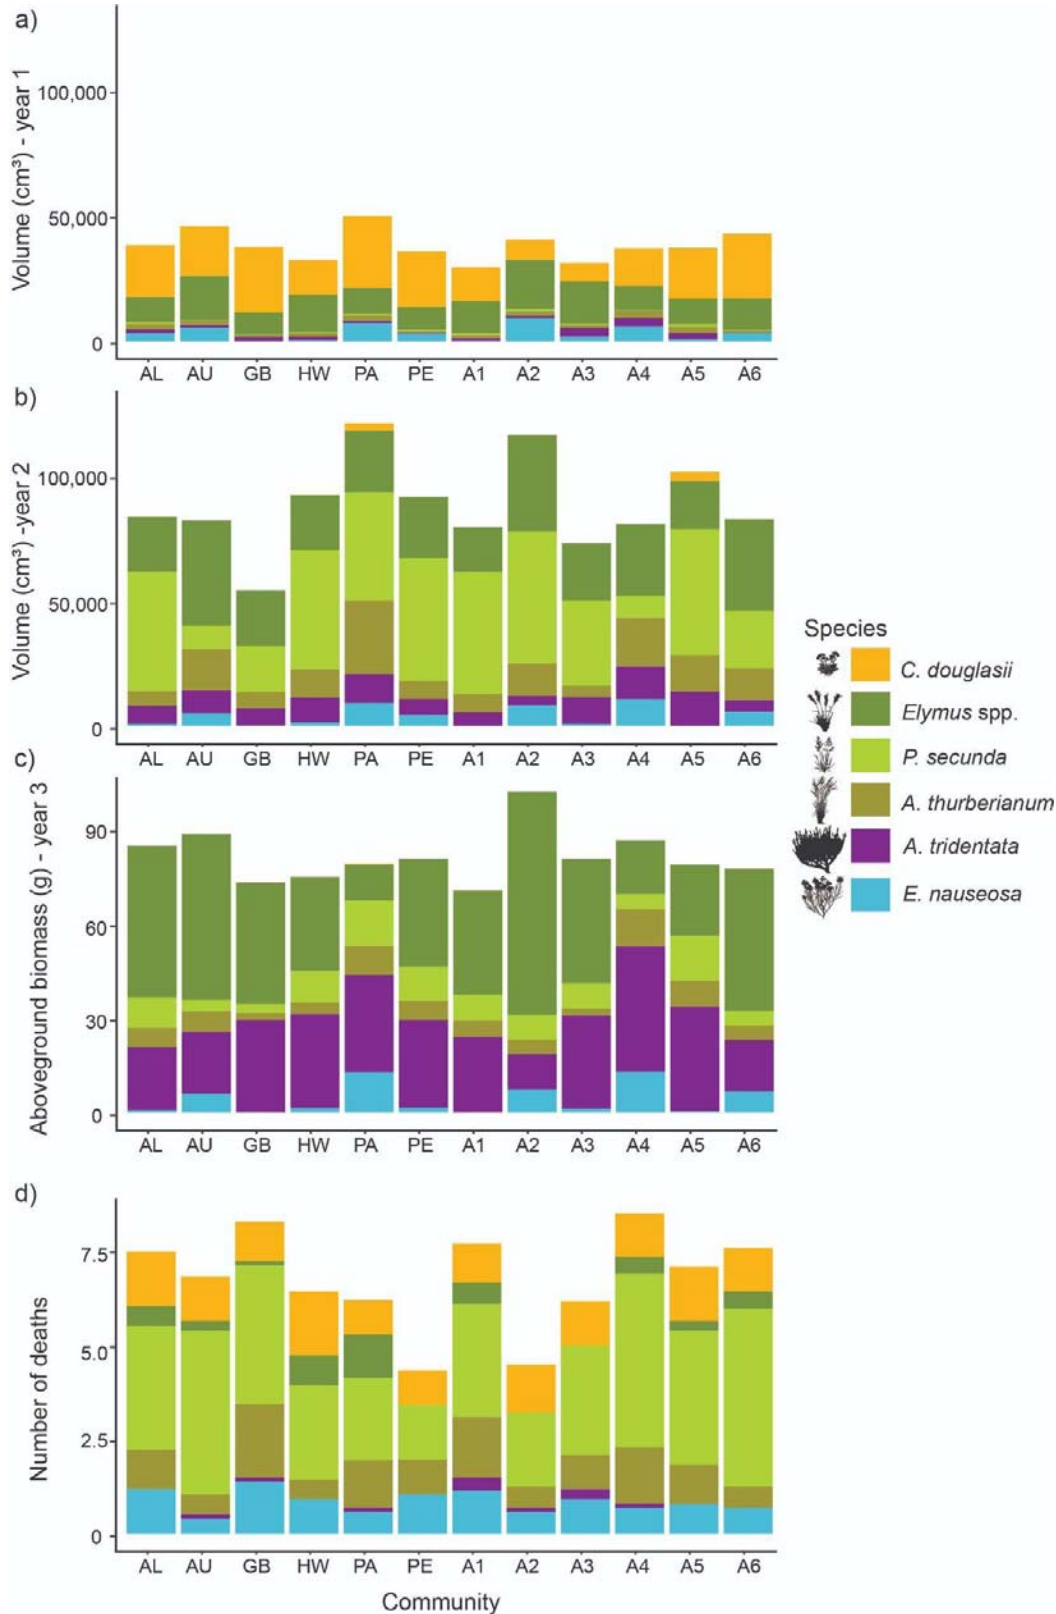

690

691 Figure 2

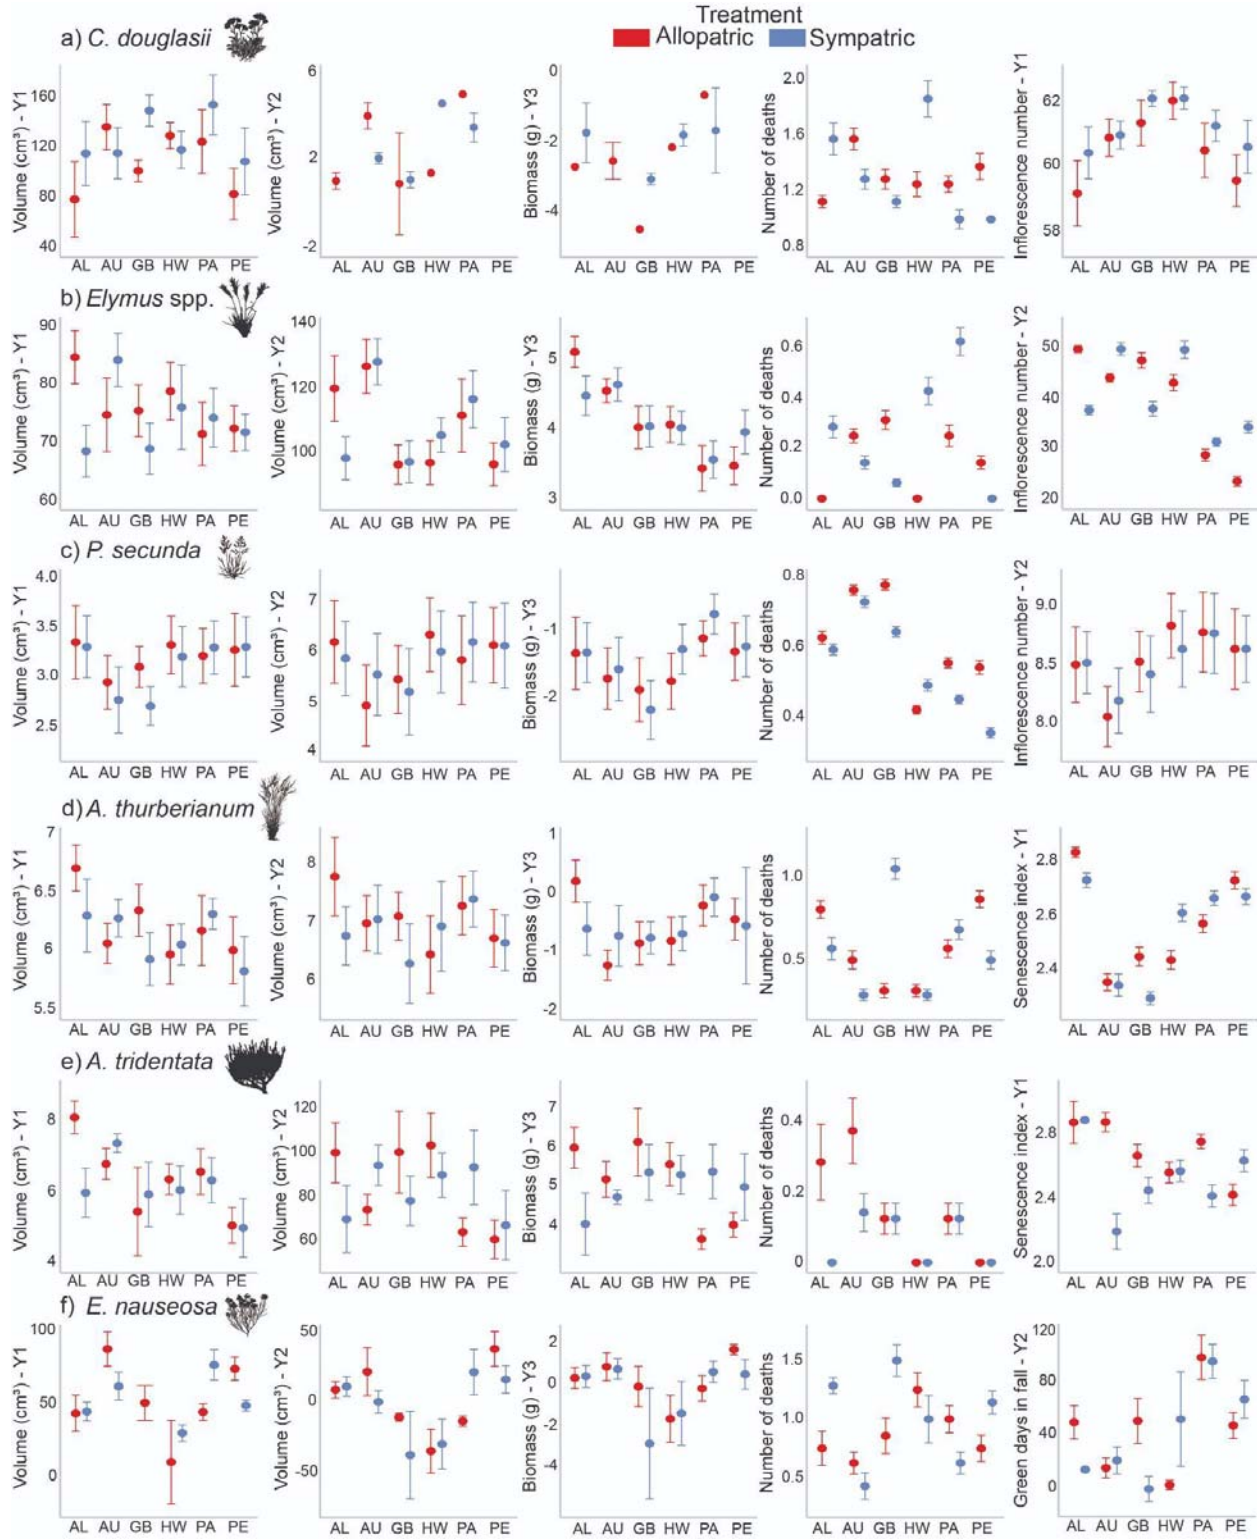

692

693

694 Figure 3

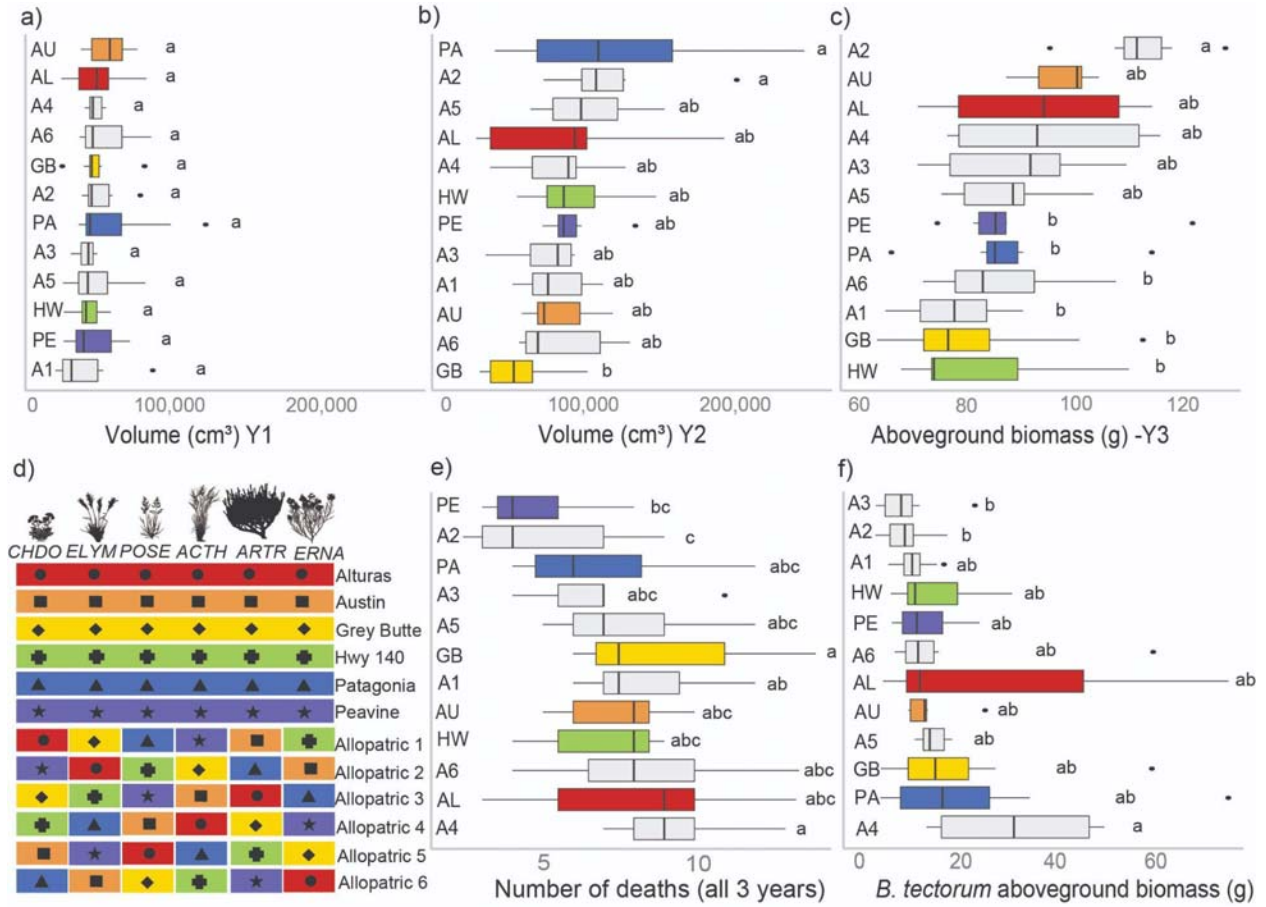

695

696

697 Figure 4

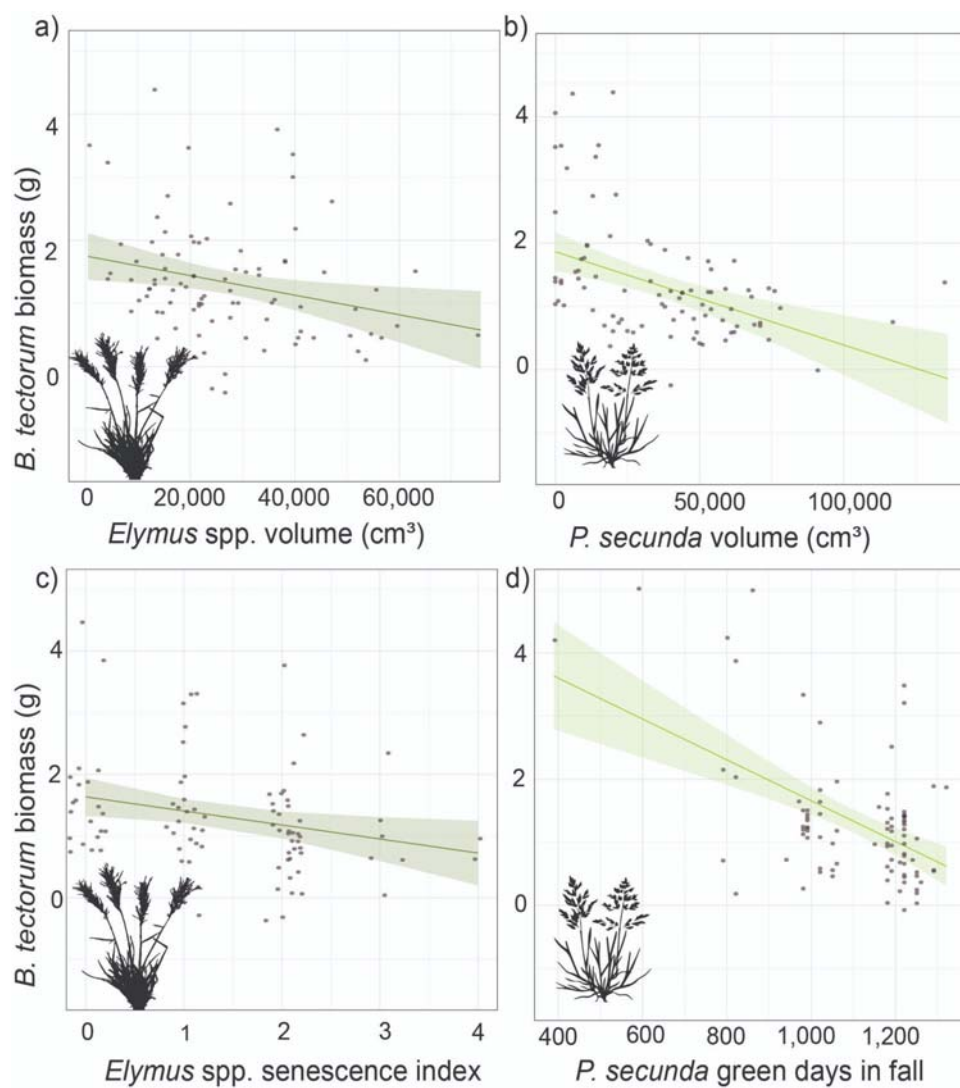

698
